# Supplementary material for: Association between triglyceride-to-high-density lipoprotein cholesterol ratio and prediabetes: a cross-sectional study in Chinese non-obese people with a normal range of low-density lipoprotein cholesterol
Source: Springer Nature journal article supplement (doi:10.1186/s12967-022-03684-1), 2022-10-22
Supplement: MOESM1 [file 23631792]

## Supplementary data

### **Association between triglyceride-to-high-density lipoprotein cholesterol ratio and prediabetes: a cross-sectional study in Chinese non-obese people with a normal range of low-density lipoprotein cholesterol**

**Running title: The relationship between TG/HDL-C ratio and Pre-DM**

Liling Wu<sup>1,2†</sup>, Xiaodan Wu<sup>3†</sup>, Haofei Hu<sup>1,2\*</sup>, Qijun Wan<sup>1,2\*</sup>

<sup>1</sup>Department of Nephrology, The First Affiliated Hospital of Shenzhen University, Shenzhen 518000, Guangdong Province, China.

<sup>2</sup>Department of Nephrology, Shenzhen Second People's Hospital, Shenzhen 518000, Guangdong Province, China.

<sup>3</sup>Department of Anesthesiology, Nanfang Hospital, Southern Medical University, Guangzhou, Guangdong 510515, P.R.China

Full list of author information is available at the end of the article.

\*Correspondence: [yiyuan2224@sina.com](mailto:yiyuan2224@sina.com) and [hahaofei0319@126.com](mailto:hahaofei0319@126.com).

†Liling Wu and Xiao-dan Wu contributed equally to this work.

**Total number of tables: 4**

**Total number of figure: 1**

**Table S1. The results of univariate analysis**

| <b>Variable</b>              | <b>Statistics</b> | <b>OR (95%CI)</b>    | <b>P value</b> |
|------------------------------|-------------------|----------------------|----------------|
| <b>Age, years</b>            | 39.591 ± 13.689   | 1.062 (1.061, 1.064) | <0.001         |
| <b>Gender</b>                |                   |                      |                |
| <b>Female</b>                | 85861 (56.059%)   | Ref.                 |                |
| <b>Male</b>                  | 67302 (43.941%)   | 2.254 (2.177, 2.334) | <0.001         |
| <b>BMI, kg/m<sup>2</sup></b> | 21.074 ± 2.069    | 1.267 (1.256, 1.279) | <0.001         |
| <b>GGT,U/L</b>               | 25.317 ± 23.627   | 1.009 (1.009, 1.010) | <0.001         |
| <b>ALT,U/L</b>               | 18.804 ± 17.308   | 1.003 (1.003, 1.004) | <0.001         |
| <b>AST,U/L</b>               | 22.241 ± 11.084   | 1.008 (1.007, 1.010) | <0.001         |
| <b>ALB,g/L</b>               | 44.522 ± 3.019    | 0.988 (0.983, 0.994) | <0.001         |
| <b>GLB,g/L</b>               | 29.297 ± 3.785    | 1.032 (1.027, 1.036) | <0.001         |
| <b>TB, umol/L</b>            | 12.086 ± 5.061    | 1.008 (1.005, 1.011) | <0.001         |
| <b>DBIL, umol/L</b>          | 2.008 ± 1.041     | 0.968 (0.952, 0.984) | <0.001         |
| <b>BUN,mmol/L</b>            | 4.344 ± 1.269     | 1.317 (1.301, 1.333) | <0.001         |
| <b>Scr, umol/L</b>           | 77.374 ± 21.885   | 1.016 (1.015, 1.017) | <0.001         |
| <b>UA, umol/L</b>            | 271.415 ± 83.919  | 1.003 (1.003, 1.003) | <0.001         |
| <b>TC, mmol/L</b>            | 4.484 ± 0.719     | 1.428 (1.395, 1.462) | <0.001         |
| <b>TG, mmol/L</b>            | 1.121 ± 0.538     | 1.873 (1.825, 1.923) | <0.001         |
| <b>HDL-C, mmol/L</b>         | 1.490 ± 0.348     | 0.708 (0.673, 0.745) | <0.001         |
| <b>LDL-C, mmol/L</b>         | 2.222 ± 0.470     | 1.781 (1.715, 1.848) | <0.001         |
| <b>TG/HDL-C</b>              | 0.824 ± 0.518     | 1.792 (1.744, 1.842) | <0.001         |

Values are n(%) or mean±SD

ALB, albumin; ALT, alanine aminotransferase; AST, aspartate aminotransferase; BMI, body mass index; BUN, blood urea nitrogen; Scr, serum creatinine; DBIL, direct bilirubin; TB, total bilirubin; GGT,  $\gamma$ -glutamyl transpeptidase; GLB, globulin; HDL-C, high-density lipoprotein cholesterol; LDL-C, low-density lipoprotein cholesterol; TC, total cholesterol; TG, triglyceride; UA, uric acid; TG/HDL-C: triglyceride-to-high-density lipoprotein cholesterol ratio

**Table S2. Relationship between TG/HDL-C ratio and Pre-DM in participants without excluding outliers of TG/HDL-C ratio**

| Variable           | Crude model (OR,95%CI, P)   | Model I(OR,95%CI, P)        | Model II (OR,95%CI, P)      |
|--------------------|-----------------------------|-----------------------------|-----------------------------|
| <b>TG/HDL-C</b>    | 1.710 (1.688, 1.732) <0.001 | 1.569 (1.546, 1.592) <0.001 | 1.334 (1.312, 1.356) <0.001 |
| <b>TG/HDL-C</b>    |                             |                             |                             |
| <b>(Quintile)</b>  |                             |                             |                             |
| <b>Q1</b>          | 1.0                         | 1.0                         | 1.0                         |
| <b>Q2</b>          | 1.616 (1.526, 1.710) <0.001 | 1.384 (1.302, 1.471) <0.001 | 1.275 (1.196, 1.359) <0.001 |
| <b>Q3</b>          | 2.381 (2.256, 2.512) <0.001 | 1.849 (1.745, 1.960) <0.001 | 1.592 (1.498, 1.693) <0.001 |
| <b>Q4</b>          | 3.387 (3.216, 3.568) <0.001 | 2.492 (2.356, 2.637) <0.001 | 1.933 (1.821, 2.052) <0.001 |
| <b>Q5</b>          | 5.615 (5.341, 5.903) <0.001 | 3.947 (3.737, 4.169) <0.001 | 2.548 (2.402, 2.702) <0.001 |
| <b>P for trend</b> | <0.001                      | <0.001                      | <0.001                      |

Crude model: we did not adjust other covariants

Model I: we adjusted age, sex, BMI

Model II: we adjusted age, sex, BMI, ALT, AST, GGT, ALB, GLB, DBIL, BUN, Scr, UA, TC, LDL-C, TB

OR, odds ratios; CI: confidence, Ref: reference; TG/HDL-C: triglyceride-to-high-density lipoprotein cholesterol ratio

**Table S3. The characteristics of participants between NG and Pre-DM groups.**

|                              | <b>NG</b>        | <b>Pre-DM</b>    | <b>P-value</b> |
|------------------------------|------------------|------------------|----------------|
| <b>N</b>                     | 138193           | 14970            |                |
| <b>Age(years)</b>            | 38.2 ± 12.7      | 52.3 ± 15.9      | <0.001         |
| <b>Gender</b>                |                  |                  | <0.001         |
| <b>Female</b>                | 80172 (58.0%)    | 5689 (38.0%)     |                |
| <b>Male</b>                  | 58021 (42.0%)    | 9281 (62.0%)     |                |
| <b>BMI(kg/m<sup>2</sup>)</b> | 21.0 ± 2.1       | 21.9 ± 1.9       | <0.001         |
| <b>GGT(U/L)</b>              | 19.0 (14.0-28.4) | 23.0 (17.0-35.0) | <0.001         |
| <b>ALT(U/L)</b>              | 15.0 (11.0-22.5) | 17.0 (13.0-23.0) | <0.001         |
| <b>AST(U/L)</b>              | 20.0 (17.0-25.0) | 22.0 (19.0-26.0) | <0.001         |
| <b>ALB(g/L)</b>              | 44.5 ± 3.0       | 44.4 ± 3.0       | <0.001         |
| <b>GLB(g/L)</b>              | 29.3 ± 3.8       | 29.7 ± 4.0       | <0.001         |
| <b>TB(umol/L)</b>            | 12.1 ± 5.1       | 12.3 ± 5.0       | <0.001         |
| <b>DBIL(umol/L)</b>          | 1.9 (1.3-2.6)    | 1.8 (1.3-2.5)    | 0.0004         |
| <b>BUN(mmol/L)</b>           | 4.3 ± 1.2        | 4.8 ± 1.5        | <0.001         |
| <b>Scr(umol/L)</b>           | 76.6 ± 20.2      | 84.8 ± 33.0      | <0.001         |
| <b>SUA(umol/L)</b>           | 269.3 ± 83.4     | 291.4 ± 86.5     | <0.001         |
| <b>FPG(mmol/L)</b>           | 4.9 ± 0.3        | 6.0 ± 0.3        | <0.001         |
| <b>TC(mmol/L)</b>            | 4.5 ± 0.7        | 4.7 ± 0.7        | <0.001         |
| <b>TG(mmol/L)</b>            | 1.1 ± 0.5        | 1.3 ± 0.6        | <0.001         |
| <b>HDL-C(mmol/L)</b>         | 1.5 ± 0.3        | 1.5 ± 0.4        | <0.001         |
| <b>LDL-C(mmol/L)</b>         | 2.2 ± 0.5        | 2.3 ± 0.5        | <0.001         |
| <b>TG/HDL-C</b>              | 0.7 (0.5-1.0)    | 0.8 (0.6-1.3)    | <0.001         |

Values are n (%) or mean ± SD or median (quartile)

ALB, albumin; ALT, alanine aminotransferase; AST, aspartate aminotransferase; BMI, body mass index; BUN, blood urea nitrogen; Scr, serum creatinine; DBIL, direct bilirubin; TB, total bilirubin; FPG, fasting plasma glucose; GGT,  $\gamma$ -glutamyl transpeptidase; GLB, globulin; HDL-C, high-density lipoprotein cholesterol; LDL-C, low-density lipoprotein cholesterol; TC, total cholesterol; TG, triglyceride; UA, uric acid; TG/HDL-C: triglyceride-to-high-density lipoprotein cholesterol ratio

**Table S4. The characteristics of participants on both sides of the inflection point.**

| <b>TG/HDL-C ratio</b>        | <b>&lt;1.617</b> | <b>&gt;=1.617</b> | <b>P-value</b> |
|------------------------------|------------------|-------------------|----------------|
| <b>N</b>                     | 140439           | 12724             |                |
| <b>Age(years)</b>            | 39.2 ± 13.6      | 44.0 ± 14.0       | <0.001         |
| <b>Gender</b>                |                  |                   | <0.001         |
| <b>Female</b>                | 82902 (59.0%)    | 2959 (23.3%)      |                |
| <b>Male</b>                  | 57537 (41.0%)    | 9765 (76.7%)      |                |
| <b>BMI(kg/m<sup>2</sup>)</b> | 21.0 ± 2.1       | 22.4 ± 1.7        | <0.001         |
| <b>GGT(U/L)</b>              | 19.0 (14.0-28.0) | 28.0 (20.0-42.0)  | <0.001         |
| <b>ALT(U/L)</b>              | 15.0 (11.0-22.0) | 20.0 (14.0-28.0)  | <0.001         |
| <b>AST(U/L)</b>              | 20.0 (17.0-25.0) | 22.0 (19.0-26.0)  | <0.001         |
| <b>ALB(g/L)</b>              | 44.5 ± 3.0       | 44.9 ± 2.9        | <0.001         |
| <b>GLB(g/L)</b>              | 29.3 ± 3.8       | 29.4 ± 3.8        | 0.017          |
| <b>TB(umol/L)</b>            | 12.1 ± 5.1       | 12.1 ± 5.1        | <0.001         |
| <b>DBIL(umol/L)</b>          | 1.9 (1.3-2.6)    | 1.7 (1.2-2.4)     | <0.001         |
| <b>BUN(mmol/L)</b>           | 4.3 ± 1.3        | 4.5 ± 1.4         | <0.001         |
| <b>Scr(umol/L)</b>           | 76.6 ± 20.7      | 86.4 ± 30.5       | <0.001         |
| <b>UA(umol/L)</b>            | 265.6 ± 81.3     | 335.5 ± 86.1      | <0.001         |
| <b>FPG(mmol/L)</b>           | 5.0 ± 0.5        | 5.2 ± 0.5         | 0.190          |
| <b>TC(mmol/L)</b>            | 4.5 ± 0.7        | 4.7 ± 0.7         | <0.001         |
| <b>TG(mmol/L)</b>            | 0.9 (0.7-1.2)    | 2.2 (1.9-2.6)     | <0.001         |
| <b>HDL-C(mmol/L)</b>         | 1.5 ± 0.3        | 1.1 ± 0.2         | <0.001         |
| <b>LDL-C(mmol/L)</b>         | 2.2 ± 0.5        | 2.4 ± 0.4         | <0.001         |
| <b>TG/HDL-C</b>              | 0.6 (0.5-0.9)    | 2.0 (1.8-2.4)     | <0.001         |

Values are n (%) or mean ± SD or median (quartile)

ALB, albumin; ALT, alanine aminotransferase; AST, aspartate aminotransferase; BMI, body mass index; BUN, blood urea nitrogen; Scr, serum creatinine; DBIL, direct bilirubin; TB, total bilirubin; FPG, fasting plasma glucose; GGT,  $\gamma$ -glutamyl transpeptidase; GLB, globulin; HDL-C, high-density lipoprotein cholesterol; LDL-C, low-density lipoprotein cholesterol; TC, total cholesterol; TG, triglyceride; UA, uric acid; TG/HDL-C: triglyceride-to-high-density lipoprotein cholesterol ratio

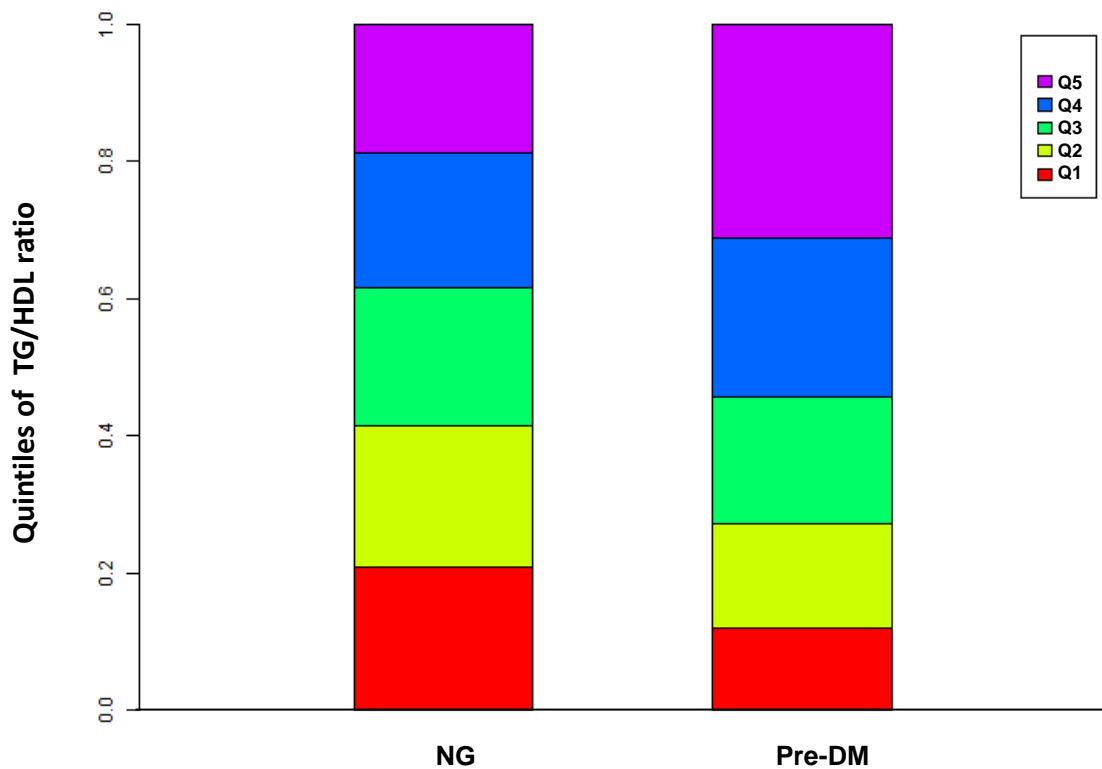

**Figure S1. The TG/HDL-C ratio levels of all participants from the Pre-DM and NG groups**

The distribution level of the TG/HDL-C ratio in the Pre-DM group was higher than the NG groups
